# Supplementary material
Source: publisher figshare collection journal article supplement (https://sage.figshare.com/ndownloader/files/20502744)
Supplement: Supplementary file 1 [file 20502744]

### Focus Group Questionnaire

1. How old was your child when they died?  
☐ less than 1 year  
☐ 1-4 years  
☐ 5-9 years  
☐ 10-14 years  
☐ 15-19 years  
☐ 20-24 years  
☐ 25 years or older
2. What type of cancer did your child have? \_\_\_\_\_
3. When did your child die (month, year)? \_\_\_\_\_
4. Where did your child die?  
☐ in the hospital on the general care floor  
☐ in the intensive care unit  
☐ at home  
☐ other (please clarify \_\_\_\_\_)
5. Overall, how well do you think your child's death went?  
☐ very well  
☐ well  
☐ unsure  
☐ poorly  
☐ very poorly
6. How long before your child's death do you think you knew that curing their disease was no longer an option? \_\_\_\_\_
7. Do you think your child knew that they were going to die? \_\_\_\_\_
  - a. If yes, how long before their death do you think your child knew that they were going to die? \_\_\_\_\_
  - b. Did they do something to make you think they knew at that time?  
\_\_\_\_\_
8. Many tough decisions are faced near the end of a child's life. When you think back to that time, do you feel that (please choose one):  
☐ most decisions were made by me/my family  
☐ most decisions were a shared decision between me/my family and the doctor  
☐ most decisions were made by the doctor

9. Were you offered palliative care services?

\_\_\_\_yes

\_\_\_\_no

\_\_\_\_unsure

10. Were you offered hospice services?

\_\_\_\_yes

\_\_\_\_no

\_\_\_\_unsure

11. Was your child enrolled in hospice?

\_\_\_\_yes

\_\_\_\_no

\_\_\_\_unsure

12. If you interacted with these services, how helpful were they in taking care of your child at the end of their life? Please choose one for each service.

|                       | Did not<br>interact<br>with this<br>service | Not<br>helpful at<br>all | A little<br>helpful | Somewhat<br>helpful | Very<br>Helpful |
|-----------------------|---------------------------------------------|--------------------------|---------------------|---------------------|-----------------|
| Child Life            |                                             |                          |                     |                     |                 |
| Pain Team             |                                             |                          |                     |                     |                 |
| Palliative Care       |                                             |                          |                     |                     |                 |
| Psychiatry/Psychology |                                             |                          |                     |                     |                 |
| Social Work           |                                             |                          |                     |                     |                 |
| Spiritual Care        |                                             |                          |                     |                     |                 |

13. How well was your child's pain controlled at the end of life?

\_\_\_\_very well

\_\_\_\_well

\_\_\_\_neutral

\_\_\_\_poorly

\_\_\_\_very poorly

\_\_\_\_my child did not need any pain control

14. How well was your child's nausea controlled at the end of life?

- ☐ very well
- ☐ well
- ☐ neutral
- ☐ poorly
- ☐ very poorly
- ☐ my child did not need any nausea control

15. How well was your child's difficulty with breathing controlled at the end of life?

- ☐ very well
- ☐ well
- ☐ neutral
- ☐ poorly
- ☐ very poorly
- ☐ my child did not need any help due to difficulty breathing

16. What is your gender? \_\_\_\_\_

17. What is your age? \_\_\_\_\_

18. What is your relationship to the child who died? \_\_\_\_\_
